# Supplementary material
Source: PubMed Central journal article supplement (PMC1808342)
Supplement: NIHMS13213-supplement-supp.pdf [file NIHMS13213-supplement-supp.pdf]

## **Inhibitors and Inactivators of Protein Arginine Deiminase 4:**

### **Functional and structural characterization<sup>†</sup>**

Yuan Luo<sup>‡</sup>, Kyouhei Arita<sup>§</sup>, Monica Bhatia<sup>‡</sup>, Bryan Knuckley<sup>‡</sup>, Young-Ho

Lee<sup>δ</sup>, Michael R. Stallcup<sup>δ</sup>, Mamoru Sato<sup>§</sup>, and Paul R. Thompson<sup>+\*</sup>

Department of Chemistry & Biochemistry, University of South Carolina, 631 Sumter  
Street, Columbia, SC 29208

Department of Biochemistry & Molecular Biology, University of Southern California,  
1333 San Pablo Street, MCA 51A, Los Angeles, CA 90089

Graduate School of Integrated Science, Yokohama City University, 1-7-29 Suehiro-cho,  
Tsurumi-ku, Yokohama 230-0045, Japan.

Running Title: Inhibitors and inactivators of PAD4

---

<sup>†</sup> This work was supported in part by the start up funds from the University of South Carolina Research Foundation (P.R.T.) and National Institutes of Health grant DK55274 to MRS.

<sup>‡</sup> Department of Chemistry & Biochemistry, University of South Carolina.

<sup>§</sup> Graduate School of Integrated Science, Yokohama City University.

<sup>δ</sup> Department of Biochemistry & Molecular Biology, University of Southern California.

\* To whom correspondence should be addressed: Department of Chemistry & Biochemistry, University of South Carolina, 631 Sumter Street, Columbia, SC, 29208 tel: (803)-777-6414; fax: (803)-777-9521; e-mail: [Thompson@mail.chem.sc.edu](mailto:Thompson@mail.chem.sc.edu)

## Supplemental Results

### Supplemental Figure S1. Time course experiments with 3, 6 and 9.

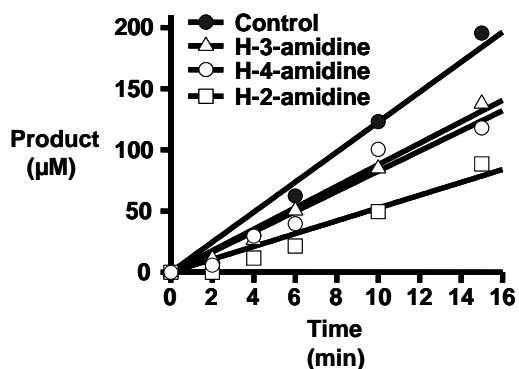

Figure S1. Plots of product formation versus time in presence of 25 mM of H2-amidine, H3-amidine and H4-amidine.

### Supplemental Figure S2. Rapid-dilution time course experiments with 4, 5,

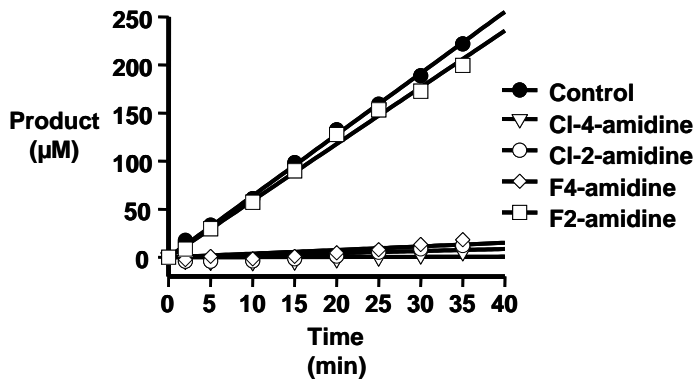

Figure S2. Rapid dilution of a preformed complex of PAD4•F2-amidine, PAD4•F4-amidine, PAD4•Cl2-amidine, or PAD4•Cl4-amidine into assay buffer containing excess substrate.

7 and 8.

Supplemental Figure S3. Lineweaver-Burk plots for H3-amidine.

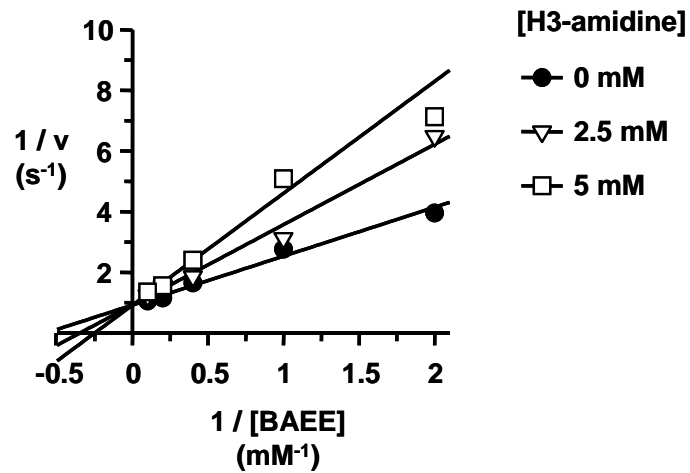

Figure S3. H3-amidine is a competitive inhibitor of PAD4. The Lineweaver-Burk plots ( $1/v_i$  versus  $1/[BAEE]$ ) depicted above are consistent with H3-amidine being a competitive inhibitor. For these studies, the steady state kinetic parameters for the deimination of BAEE were determined in the absence and presence of increasing amounts of H3-amidine.

## Supplemental Methods

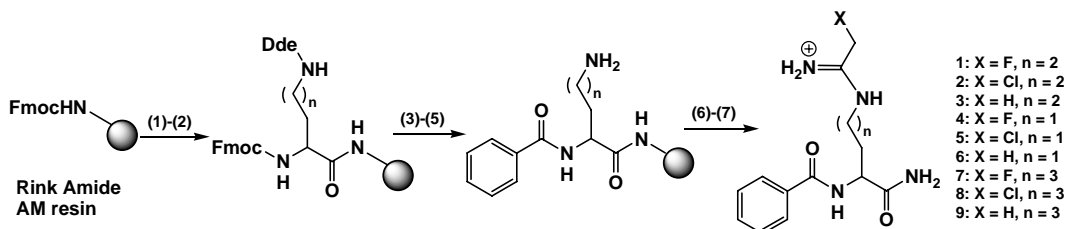

Scheme S1. Solid-phase synthesis of haloacetamide-based PAD4 inactivators/inhibitors. (1) 20 % piperidine in DMF; (2) Fmoc-AA(Dde)-OH, HOBt, HBTU, NMM, DMF; (3) 20 % piperidine, DMF; (4) benzoyl chloride, NMM, DMF; (5) 2 % hydrazine, DMF; (6) XCH<sub>2</sub>C(=NH)OEt·HCl, Et<sub>3</sub>N, DMF; (7) 95 % TFA, 2.5 % TIS, 2.5 % H<sub>2</sub>O. (X = F, Cl, or H; n = 1, AA = Dab; n = 2, AA = Orn; n = 3, AA = Lys; NMM: N-methyl morpholine; DMF: N, N-dimethylformamide; TFA: trifluoroacetic acid; TIS: triisopropylsilane)

## Inhibitor Synthesis

(Halo)acetamide-based PAD4 inhibitors/inactivators were readily synthesized using adaptations of previously described methodologies (1) (Scheme S1). Briefly, the Fmoc group on the resin was first deprotected with 20% piperidine to generate a free amine. A diamino acid (Dab, Orn or Lys), with both amino groups protected, was attached to Rink Amide AM resin via standard uronium based coupling methods, i.e. the  $\alpha$ -carboxylic acid group of the diamino acids were activated with HBTU and HOBt. After removal of the Fmoc protective group, the  $\alpha$ -amino group was benzoylated with benzoyl chloride. The Dde group was then removed with 2 % hydrazine and the free side chain amine reacted with either ethyl-, ethyl fluoro-, or ethyl-chloro-acetimidate hydrochloride to form the (halo)acetamide, i.e. for the synthesis of compounds **2-9**. The warheads in compounds **10** and **11** were generated by reacting the free amine with either fluoroacetic acid or chloroacetic acid and DIC (1,3-

diisopropylcarbodiimide). The ethyl-, ethyl fluoro, or ethyl-chloro-acetimidates were derived from the corresponding acetonitrile derivatives by reacting these compounds with ethanol in acidified ether. (2) Final compounds were cleaved from resin by a mixture of 95 % TFA, 2.5 % TIS and 2.5 % H<sub>2</sub>O, and purified on a reverse phase HPLC. Purity was assessed by <sup>1</sup>H-NMR, <sup>13</sup>C-NMR, and reverse phase HPLC.

### Structural Characterization of (Halo)acetamidine-Based Inactivators

#### 1. N- $\alpha$ -benzoyl-N<sup>5</sup>-(2-chloro-1-iminoethyl)-L-Orn amide (**2**, **Cl3-amidine**)

**2** was synthesized similarly to **1**; see above and ref. (1). <sup>1</sup>HNMR (400 MHz, CD<sub>3</sub>OD)  $\delta$ (ppm): 7.79-7.37 (m, 5H), 4.56-4.52 (dd, 1H), 4.26 (s, 2H), 3.34-3.20 (m, 2H), 1.98-1.64 (m, 4H). <sup>13</sup>CNMR (400 MHz, CD<sub>3</sub>OD)  $\delta$ (ppm): 176.46, 170.31, 164.68, 135.03, 133.08, 129.63, 128.53, 54.17, 43.53, 40.11, 30.37, 25.00. MS-ES<sup>+</sup>: 311 (M+1)<sup>+</sup>. HRMS (C<sub>14</sub>H<sub>20</sub>ClN<sub>4</sub>O<sub>2</sub><sup>+</sup>): calculated 311.1275, observed 311.1266.

#### 2. N- $\alpha$ -benzoyl-N<sup>5</sup>-(1-iminoethyl)-L-Orn amide (**3**, **H3-amidine**)

**3** was synthesized similarly to **1**; see above and ref. (1). <sup>1</sup>HNMR (400 MHz, D<sub>2</sub>O)  $\delta$ (ppm): 7.71-7.42 (m, 5H), 4.43-4.39 (dd, 1H), 3.23-3.20 (t, 2H), 2.09 (s, 3H), 1.96-1.63 (m, 4H). <sup>13</sup>CNMR (400 MHz, CD<sub>3</sub>OD)  $\delta$ (ppm): 176.68, 170.46, 166.33, 135.21, 133.20, 129.77, 128.68, 54.39, 43.21, 30.57, 25.35, 19.02. MS-ES<sup>+</sup>: 277 (M+1)<sup>+</sup>. HRMS (C<sub>14</sub>H<sub>21</sub>N<sub>4</sub>O<sub>2</sub><sup>+</sup>): calculated 277.1665 observed 277.1660.

#### 3. N- $\alpha$ -benzoyl-N<sup>4</sup>-(2-fluoro-1-iminoethyl)-L-Dab amide (**4**, **F2-amidine**)

**4** was synthesized similarly to **1**; see above and ref. (1).  $^1\text{H}$ NMR (400 MHz,  $\text{CD}_3\text{OD}$ )  $\delta$ (ppm): 7.93-7.47 (m, 5H), 5.35-5.24 (d,  $^2J_{\text{H-F}}=45.4$  Hz, 2H), 4.71-4.67 (dd, 1H), 3.57-3.41 (m, 2H), 2.39-2.10 (m, 2H).  $^{13}\text{C}$ NMR (400 MHz,  $\text{CD}_3\text{OD}$ )  $\delta$ (ppm): 176.13, 170.56, 164.87, 164.68 ( $^2J_{\text{C-F}} = 19.7$  Hz), 135.00, 133.28, 129.76, 128.82, 80.04, 78.26 ( $^1J_{\text{C-F}} = 179.4$  Hz), 52.50, 40.76, 31.12.  $^{19}\text{F}$ NMR (400 MHz,  $\text{CD}_3\text{OD}$ )  $\delta$ (ppm): -158.09, -158.21, -158.33 ( $^2J_{\text{H-F}}=45.8$  Hz). MS-ES $^+$ : 281 (M+1) $^+$ . HRMS ( $\text{C}_{13}\text{H}_{18}\text{FN}_4\text{O}_2^+$ ): calculated 281.1414, observed 281.1404.

4. N- $\alpha$ -benzoyl-N $^4$ -(2-chloro-1-iminoethyl)-L-Dab amide (**5**, **C12-amidine**)

**5** was synthesized similarly to **1**; see above and ref. (1).  $^1\text{H}$ NMR (400 MHz,  $\text{CD}_3\text{OD}$ )  $\delta$ (ppm): 7.92-7.46 (m, 5H), 4.70-4.67 (dd, 1H), 4.41 (s, 2H), 3.57-3.40 (m, 2H), 2.39-2.10 (m, 2H).  $^{13}\text{C}$ NMR (400 MHz,  $\text{CD}_3\text{OD}$ )  $\delta$ (ppm): 176.09, 170.56, 165.05, 135.00, 133.27, 129.76, 128.83, 52.55, 41.37, 40.30, 30.95. MS-ES $^+$ : 297 (M+1) $^+$ . HRMS ( $\text{C}_{13}\text{H}_{18}\text{ClN}_4\text{O}_2^+$ ): calculated 297.1118, observed 297.1119.

5. N- $\alpha$ -benzoyl-N $^4$ -(1-iminoethyl)-L-Dab amide (**6**, **H2-amidine**)

**6** was synthesized similarly to **1**; see above and ref. (1).  $^1\text{H}$ NMR (400 MHz,  $\text{CD}_3\text{OD}$ )  $\delta$ (ppm): 7.92-7.46 (m, 5H), 4.70-4.67 (dd, 1H), 3.48-3.33 (m, 2H), 2.39-2.07 (m, 2H), 2.23 (s, 3H).  $^{13}\text{C}$ NMR (400 MHz,  $\text{CD}_3\text{OD}$ )  $\delta$ (ppm): 176.21, 170.54, 166.61, 135.04, 133.24, 129.75, 128.81, 52.61, 40.80, 31.10, 19.15. MS-ES $^+$ : 263 (M+1) $^+$ . HRMS ( $\text{C}_{13}\text{H}_{19}\text{N}_4\text{O}_2^+$ ): calculated 263.1508, observed 263.1496.

6. N- $\alpha$ -benzoyl-N $^6$ -(2-fluoro-1-iminoethyl)-L-Lys amide (**7**, **F4-amidine**)

**7** was synthesized similarly to **1**; see above and ref. (1).  $^1\text{H}$ NMR (400 MHz,  $\text{CD}_3\text{OD}$ )  $\delta$ (ppm): 7.88-7.45(m, 5H), 5.28-5.17 (d,  $^2J_{\text{H-F}} = 45.4$  Hz, 2H), 4.60-4.57 (dd, 1H), 3.35-3.32 (t, 2H), 2.02-1.80 (m, 2H), 1.78-1.65 (m, 2H), 1.61-1.43 (m, 2H).  $^{13}\text{C}$ NMR (400 MHz,  $\text{CD}_3\text{OD}$ )  $\delta$ (ppm): 177.12, 170.39, 164.39, 164.20 ( $^2J_{\text{C-F}}=19$  Hz), 135.30, 133.14, 129.76, 128.67, 79.98, 78.21 ( $^1J_{\text{C-F}}=179$  Hz), 54.81, 43.48, 32.81, 28.23, 24.40.  $^{19}\text{F}$ NMR (400 MHz,  $\text{CD}_3\text{OD}$ )  $\delta$ (ppm): -157.90, -158.03, -158.15 ( $^2J_{\text{H-F}} = 45.8$  Hz). MS-ES $^+$ : 309 (M+1) $^+$ . HRMS ( $\text{C}_{15}\text{H}_{22}\text{FN}_4\text{O}_2^+$ ): calculated 309.1727, observed 309.1727.

7. N- $\alpha$ -benzoyl-N $^6$ -(2-chloro-1-iminoethyl)-L-Lys amide (**8**, **Cl4-amidine**)

**8** was synthesized similarly to **1**; see above and ref. (1).  $^1\text{H}$ NMR (400 MHz,  $\text{D}_2\text{O}$ )  $\delta$ (ppm): 7.71-7.42 (m, 5H), 4.42-4.38 (dd, 1H), 4.24 (s, 2H), 3.27-3.24 (t, 2H), 1.92-1.70 (m, 2H), 1.69-1.55 (m, 2H), 1.51-1.34 (m, 2H).  $^{13}\text{C}$ NMR (400 MHz,  $\text{CD}_3\text{OD}$ )  $\delta$ (ppm): 177.08, 170.38, 164.71, 135.29, 133.14, 129.76, 128.68, 54.78, 44.00, 40.24, 32.82, 28.11, 24.41. MS-ES $^+$ : 325 (M+1) $^+$ . HRMS ( $\text{C}_{15}\text{H}_{22}\text{ClN}_4\text{O}_2^+$ ): calculated 325.1431, observed 325.1432.

8. N- $\alpha$ -benzoyl-N $^6$ -(1-iminoethyl)-L-Lys amide (**9**, **H4-amidine**)

**9** was synthesized similarly to **1**; see above and ref. (1).  $^1\text{H}$ NMR (400 MHz,  $\text{CD}_3\text{OD}$ )  $\delta$ (ppm): 7.88-7.45 (m, 5H), 4.60-4.57 (dd, 1H), 3.25-3.22 (t, 2H), 2.17 (s, 3H), 2.00-1.76 (m, 2H), 1.74-1.64 (m, 2H), 1.60-1.44 (m, 2H).  $^{13}\text{C}$ NMR (400 MHz,  $\text{CD}_3\text{OD}$ )  $\delta$ (ppm): 176.96, 170.22, 166.04, 135.17, 132.99, 129.61, 128.51, 54.65,

43.39, 32.68, 28.13, 24.31, 18.82. MS-ES<sup>+</sup>: 291 (M+1)<sup>+</sup>. HRMS (C<sub>15</sub>H<sub>23</sub>N<sub>4</sub>O<sub>2</sub><sup>+</sup>): calculated 291.1821, observed 291.1812.

9. N- $\alpha$ -benzoyl-N<sup>5</sup>-(2-fluoroacetyl)-L-Orn amide (**10**)

**10** was synthesized similarly to **1**; see above and ref. (1). <sup>1</sup>HNMR (400 MHz, CD<sub>3</sub>OD)  $\delta$ (ppm): 7.80-7.30 (m, 5H), 4.76-4.62 (d, 2H, <sup>2</sup>J<sub>H-F</sub> = 47.0 Hz), 4.48-4.43 (dd, 1H), 3.27-3.16 (m, 2H), 1.89-1.68 (m, 2H), 1.62-1.50 (m, 2H). <sup>13</sup>CNMR (400 MHz, CD<sub>3</sub>OD)  $\delta$ (ppm): 177.01, 170.70, 170.52, 170.34, 135.24, 132.90, 129.57, 128.55, 81.94, 80.12, 54.67, 39.41, 30.52, 27.15. <sup>19</sup>FNMR (400 MHz, CD<sub>3</sub>OD)  $\delta$ (ppm): -53.62, -53.74, -53.87 (<sup>2</sup>J<sub>H-F</sub> = 47.0 Hz). MS-ES<sup>+</sup>: 296 (M+1)<sup>+</sup>.

10. N- $\alpha$ -benzoyl-N<sup>5</sup>-(2-chloroacetyl)-L-Orn amide (**11**)

**11** was synthesized similarly to **1**; see above and ref. (1). <sup>1</sup>HNMR (300 MHz, CD<sub>3</sub>OD)  $\delta$ (ppm): 7.86-7.44 (m, 5H), 4.61-4.56 (dd, 1H), 4.02 (s, 2H), 3.35-3.21 (m, 2H), 2.01-1.76 (m, 2H), 1.73-1.62 (m, 2H). <sup>13</sup>CNMR (400 MHz, CD<sub>3</sub>OD)  $\delta$ (ppm): 176.95, 170.31, 169.45, 135.26, 132.88, 129.55, 128.54, 54.63, 43.18, 40.28, 30.52, 27.02. MS-ES<sup>+</sup>: 312 (M+1)<sup>+</sup>.

## References

1. Luo, Y., Knuckley, B., Lee, Y. H., Stallcup, M. R., and Thompson, P. R. (2006) A Fluoro-Acetamidine Based Inactivator of Protein Arginine Deiminase 4 (PAD4): Design, Synthesis, and in vitro and in vivo Evaluation. *J Am Chem Soc* 128, 1092-1093.
2. Hughes, L. R., Jackman, A. L., Oldfield, J., Smith, R. C., Burrows, K. D., Marsham, P. R., Bishop, J. A. M., Jones, T. R., O'Connor, B. M., and Calvert, A. H. (1990) Quinazoline antifolate thymidylate synthase inhibitors: alkyl, substituted alkyl, and aryl substituents in the C2 position. *J. Med. Chem.* 33, 3060-3067.
